# Supplementary material for: Air pollution measurement errors: is your data fit for purpose?
Source: Copernicus journal article supplement (doi:10.5194/amt-15-4091-2022), 2022-07-13
Supplement: Supplementary file 1 [file amt-15-4091-2022-supplement.pdf]

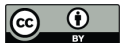

*Supplement of*

## **Air pollution measurement errors: is your data fit for purpose?**

**Sebastian Diez et al.**

*Correspondence to:* Sebastian Diez ([sebastian.diez@york.ac.uk](mailto:sebastian.diez@york.ac.uk)) and Pete M. Edwards ([pete.edwards@york.ac.uk](mailto:pete.edwards@york.ac.uk))

The copyright of individual parts of the supplement might differ from the article licence.

1 **Table S1. Research grade instrumentation used for this study.**

| Analyte           | Manchester                     |                                         |                                         | York                                       |
|-------------------|--------------------------------|-----------------------------------------|-----------------------------------------|--------------------------------------------|
| NO <sub>2</sub>   | *Teledyne T500U<br>(CAPS)      | **Teledyne T200U<br>(Chemiluminescence) | **Teledyne T200U<br>(Chemiluminescence) | -----                                      |
| O <sub>3</sub>    | *Thermo 49i<br>(UV photometry) | **Thermo 49i<br>(UV photometry)         | **2B<br>(UV photometry)                 | -----                                      |
| PM <sub>2.5</sub> | -----                          | -----                                   | -----                                   | *Met One BAM<br>1020<br>(Beta attenuation) |

2 \*Instruments permanently deployed at the site.

3 \*\*Instruments temporarily deployed as part of the QUANT study.

4

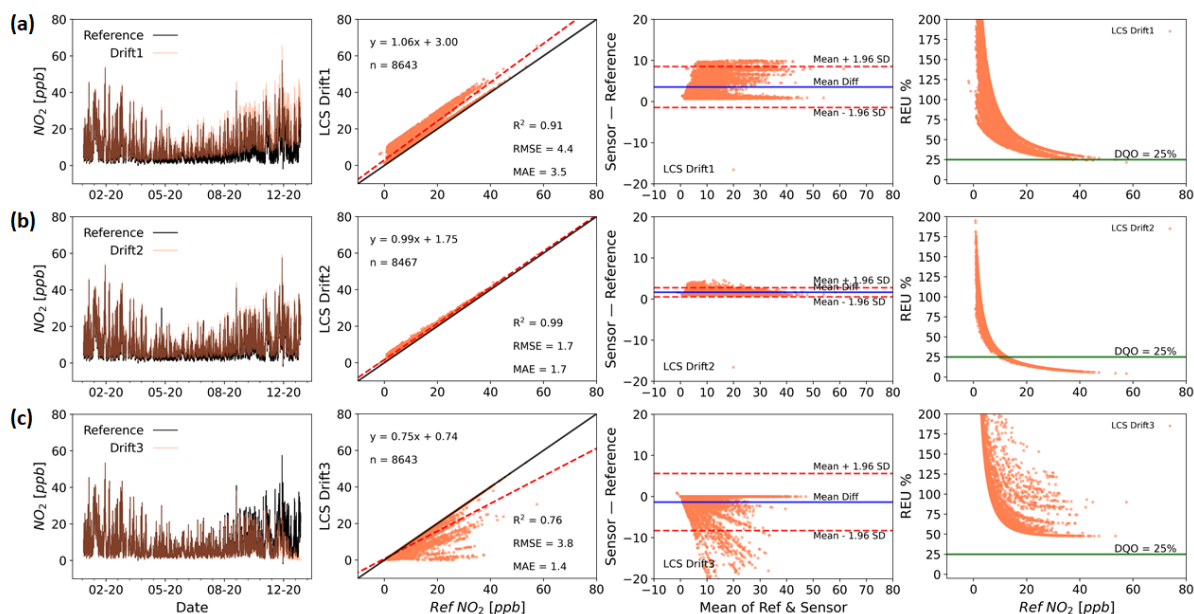

5

6 **Figure S1. Time series (left panels), regression plots (middle-left panels), Bland-Altman plots (middle-right panels) and**  
 7 **REU (right panels, DQO for NO<sub>2</sub> = 25%) for baseline drift (a-panels), temperature interference drift (b-panels), and**  
 8 **instrument sensitivity drift (c-panels) simulated errors.**

9

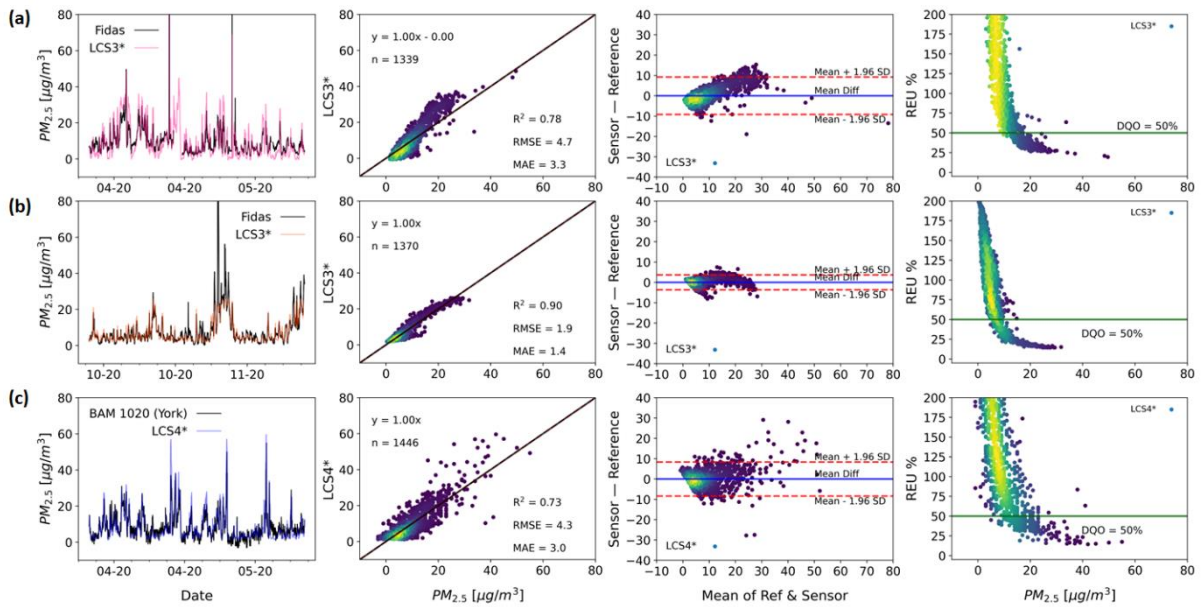

10  
11  
12  
13  
14  
15  
16  
17

**Figure S2.** Two bias corrected LCS systems (LCS3 & LCS4, same brand) measuring PM<sub>2.5</sub> (Time res 1 h). While LCS3 is shown for the same location (Manchester) but unfolded in two different seasons (a-panels: Apr to May 2020; b-panels: Oct to Nov 2020), LCS4 is at a different location (c-panels: York, Apr to May 2020). Time series (left panels), regression plots (middle-left panels), Bland-Altman plots (middle-right panels) and REU (right panels;  $DQO_{PM_{2.5}} = 50\%$ ) are used to characterise the device's error structure. All but the time-series plots have been coloured by data density (darker colours denote lower density and lighter colours denote higher density).

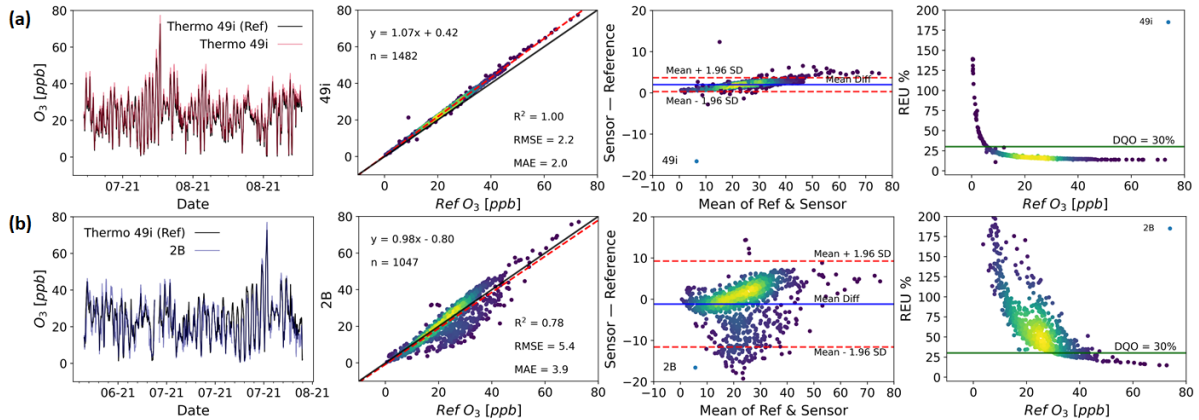

18  
19  
20  
21  
22

**Figure S3.** Time series (left panels), regression plots (middle-left panels), Bland-Altman plots (middle-right panels) and REU (right panels,  $DQO$  for  $O_3 = 30\%$ ) for two ozone research grade instruments (1hr time res): a Thermo 49i (a-panels, July & August 2021) and a 2B (b-panels, June and July 2021). All but the time-series plots have been coloured by data density (darker colours denote lower density and lighter colours denote higher density).
